# Supplementary material
Source: PubMed Central journal article supplement (PMC6650305)
Supplement: NIHMS1531801-supplement-1.pdf [file NIHMS1531801-supplement-1.pdf]

**Figure S1.** Overall survival in patients with lung recurrences based on bilateral versus unilateral metastases (P=0.13)

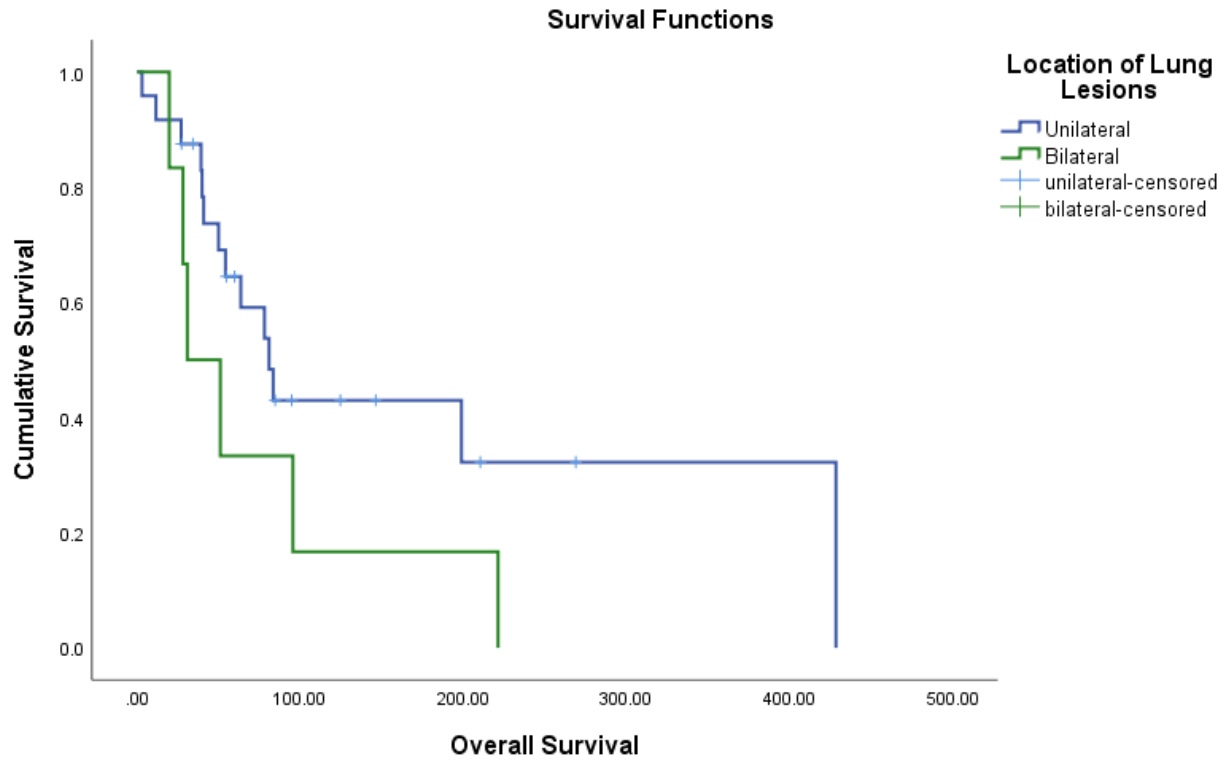

**Table S1.** Clinical characteristics of patients presenting with abdominal/pelvic recurrences (n=29)

| Variable                                        | N (%)              |
|-------------------------------------------------|--------------------|
| Median age at diagnosis (years)                 |                    |
| Median (range)                                  | 57 (34-71)         |
| FIGO Stage at diagnosis                         |                    |
| 1                                               | 19 (65.5)          |
| 2                                               | 6 (20.7)           |
| 3                                               | 1 (3.4)            |
| 4                                               | 3 (10.3)           |
| Adjuvant chemotherapy following primary surgery | 10 (34)            |
| Doxorubicin/Ifosfamide                          | 1 (10)             |
| Gemcitabine                                     | 1 (10)             |
| Gemcitabine/Docetaxel                           | 6 (60)             |
| Gemcitabine/Docetaxel/Doxorubicin               | 1 (10)             |
| Cisplatin/Paclitaxel                            | 1 (10)             |
| Adjuvant radiation following primary surgery    | 4 (14)             |
| Whole Pelvic                                    | 3 (75)             |
| Whole Pelvic + Intravaginal                     | 1 (25)             |
| Hormonal therapy following primary surgery      | 2 (6.9)            |
| Aromatase Inhibitor                             | 2 (100)            |
| Median time to recurrence (months)              |                    |
| Median (95% CI)                                 | 15.8 (13.0 – 18.6) |
| Median age at recurrence (range)                | 58.4 (35.2-75.2)   |
| Residual at recurrence surgery                  |                    |
| None                                            | 26 (89.7)          |
| Gross                                           |                    |
| <1cm                                            | 1 (3.4)            |
| ≥1cm                                            | 2 (6.9)            |
| Chemotherapy following recurrence surgery       | 7 (24)             |

---

|                                                 |                  |
|-------------------------------------------------|------------------|
| Doxorubicin/Ifosfamide                          | 4 (57)           |
| Gemcitabine                                     | 2 (28)           |
| Gemcitabine/Docetaxel                           | 1 (14)           |
| Adjuvant radiation following recurrence surgery | 9 (31)           |
| Whole Pelvic                                    | 9 (100)          |
| Hormonal therapy following recurrence surgery   | 5 (17)           |
| Aromatase Inhibitor                             | 4 (80)           |
| Selective Estrogen Receptor Modulators          | 1 (20)           |
| Overall Survival                                |                  |
| Median (95% CI)                                 | 37.7 (25.9-49.6) |
| Dead of Disease                                 | 23 (79.3)        |

---

**Table S2.** Clinical characteristics of patients presenting with lung recurrences (n=30)

| Variable                                        | N (%)            |
|-------------------------------------------------|------------------|
| Median age at diagnosis (years)                 |                  |
| Median (range)                                  | 53 (36-74)       |
| FIGO Stage at Diagnosis                         |                  |
| 1                                               | 24 (77.4)        |
| 2                                               | 1 (6.4)          |
| 3                                               | 1 (3.2)          |
| 4                                               | 1 (3.2)          |
| N/A                                             | 3 (9.7)          |
| Adjuvant chemotherapy following primary surgery | 9 (30)           |
| Doxorubicin                                     | 1 (11)           |
| Gemcitabine/Docetaxel or Paclitaxel             | 4 (44)           |
| Gemcitabine/Docetaxel/Doxorubicin               | 1 (11)           |
| Cisplatin/Ifosfamide                            | 1 (11)           |
| N/A                                             | 2 (22)           |
| Adjuvant radiation following primary surgery    | 3 (10)           |
| Whole Pelvic                                    | 3 (100)          |
| Hormonal therapy following primary surgery      | 0 (0)            |
| Median time to recurrence (months)              |                  |
| Median (95% CI)                                 | 24.1 (14.5-33.7) |
| Median age at recurrence (range)                | 56.4 (40.9-76.9) |
| Lesion site                                     |                  |
| Unilateral                                      | 24 (80)          |
| Bilateral                                       | 6 (20)           |
| Residual at recurrence surgery                  |                  |
| None                                            | 30 (96.8)        |
| Gross                                           |                  |
| <1cm                                            | 0 (0)            |
| ≥1cm                                            | 0 (0)            |

|                                               |                   |
|-----------------------------------------------|-------------------|
| Chemotherapy following recurrence surgery     | 3 (10)            |
| Gemcitabine/Docetaxel or Paclitaxel           | 2 (66)            |
| Mesna, Doxorubicin, Ifosfamide, Dacarbazine   | 1 (33)            |
| Radiation following recurrence surgery        | 1 (3)             |
| External Beam                                 | 1 (100)           |
| Hormonal therapy following recurrence surgery | 5 (16.7)          |
| Aromatase Inhibitor                           | 3 (60)            |
| Selective Estrogen Receptor Modulators        | 0 (0)             |
| Progesterone                                  | 2 (40)            |
| Overall Survival (months)                     |                   |
| Median (95% CI)                               | 78.1 (44.8-111.4) |
| Dead of Disease                               | 20 (66)           |

---

**Table S3.** Clinical characteristics of patients presenting with abdominal/pelvic and lung recurrences (n=3)

| Variable                                            | N (%)              |
|-----------------------------------------------------|--------------------|
| Median age at diagnosis (years)                     |                    |
| Median (range)                                      | 47.0 (32-51)       |
| FIGO Stage at diagnosis                             |                    |
| 1                                                   | 3 (75.0)           |
| 2                                                   | 0                  |
| 3                                                   | 0                  |
| 4                                                   | 0                  |
| Adjuvant chemotherapy following primary surgery     | 0                  |
| Adjuvant radiation following primary surgery        | 0                  |
| Adjuvant hormonal therapy following primary surgery | 0                  |
| Median time to recurrence (months)                  |                    |
| Median (95% CI)                                     | 65.7 (0 – 145.6)   |
| Median age at recurrence (range)                    | 46.5 (38.8 – 64.5) |
| Residual at recurrence surgery                      |                    |
| None                                                | 2 (66)             |
| Gross                                               |                    |
| <1cm                                                | 1 (33)             |
| ≥1cm                                                | 0 (0)              |
| Adjuvant chemotherapy following recurrence surgery  | 0                  |
| Adjuvant radiation following recurrence surgery     | 0                  |
| Hormonal therapy following recurrence surgery       | 0                  |
| Overall Survival (months)                           |                    |
| Median (95% CI)                                     | NE (NE)            |

NE – Not Estimable
